# Supplementary material for: Combined Developmental Toxicity of the Pesticides Difenoconazole and Dimethomorph on Embryonic Zebrafish
Source: MDPI journal article supplement (doi:10.3390/toxins13120854), 2021-12-01
Supplement: s1 [file s1]

# Supplementary Materials: Combined Developmental Toxicity of the Pesticides Difenconazole and Dimethomorph on Embryonic Zebrafish

Ruiqi Fan, Wanjun Zhang, Li Jia, Lizhong Li, Jun Zhao, Zengming Zhao, Shuangqing Peng, Yiqiang Chen and Xiaoyan Yuan

## 1. mRNA Library Construction

Firstly, RIN (RNA integrity number) and concentration were assessed using Fragment Analyzer 5400 (Agilent, USA), the RIN number should be over 8. Oligo(dT)-attached magnetic beads were then used to purify mRNA. The upcoming step was to generate the first-strand cDNA, which through a random hexamer-primed reverse transcription. Second-strand cDNA synthesis came next. The final library was formatted by single-strand circle DNA (ssCir DNA). The final library was amplified with phi29 to make DNA nanoballs (DNB), with more than 300 copies of one molecular. DNBs were loaded into the patterned nanoarray, and single-end 50 bases reads were generated on the BGISEQ500 platform (BGI-Shenzhen, China).

## 2. RNA-Seq Data Analyze

The filter of the sequencing data was with SOAPnuke [1]. We define reads that contain more than 20% of quality  $\leq 5$ -base as low-quality reads and define reads whose unknown base ('N' base) ratio is more than 5% as unknown reads. Then, low-quality and unknown reads were removed. Details of filtered reads can be found in Supplementary Table 3. The remained clean reads were obtained and stored in FASTQ format. According to the official documents, we used HISAT2 (v2.0.4) to map the clean reads to the reference genome [2]. The reference database was provided by NCBI (GRCz11). The total mapping percentage ranged from 87.13% to 91.05%. Bowtie2 (v2.2.5) was applied to align the clean reads to the reference coding gene set [3], and the mapping percentage ranged from 64.30%–77.66%. RSEM (v1.2.12) was used to calculate the expression level of genes [4]. DESeq2 (v1.4.5) was then used to analyze the differential expression levels [5]. The selected genes were transferred to Gene ID and then compared to the GO (<http://www.geneontology.org/>, accessed on 13 October 2020) and KEGG (<https://www.kegg.jp/>, accessed on 13 October 2020) database, then performed the enrichment analysis of annotated different expressed genes, results contained gene numbers and enrichment factor (See Supplementary Table 4 and 5). The significant terms and pathways were corrected by Q value with a rigorous threshold (Q value  $\leq 0.05$ ) [6]. The heatmap and GO network were completed through Hiplot (<https://hiplot.com.cn/>, accessed on 13 October 2020).

## SUPPLEMENTARY TABLES

**Supplementary Table S1:** Primer pairs of selected genes in qRT-PCR analysis

| Gene                            | Forward Primer            | Reverse Primer        |
|---------------------------------|---------------------------|-----------------------|
| <i><math>\beta</math>-actin</i> | TCAGTGCACGCTGAGAAGAT      | ATGCCAACCATCACTCCCTGA |
| <i>mcm2</i>                     | TTCGATCACTCAGGCAACTCC     | GATGCGCTGGTAGTTCTGGT  |
| <i>mcm3</i>                     | CTCAAGACACACCACGACCA      | CCGGAGACTGAATCTGTGGA  |
| <i>mcm4</i>                     | CAGTTCACAGACCCCGACTC      | TGGGGATGACTTCCTGTGGA  |
| <i>cdk1</i>                     | CACCCAAACGTTGTACGCCTG     | TTCGCCTGATGGGATGGAGT  |
| <i>cdc20</i>                    | AAAACATTGTTGGAATTGTGTTACC | AGGGGGTGTGTTTGGGTCTTG |
| <i>ccnb1</i>                    | CGTGTCAACAAGGAACACTCG     | CCTGTCGTGTTTGCGGATTG  |
| <i>msh6</i>                     | GCATGGCAGTGCTCGATGTG      | GTGACACAAGGGTGACGAGA  |
| <i>pold1</i>                    | CTGCCCTAACGGGTTTACG       | GAGCGCATGTCTTCAACAC   |

**Supplementary Table S2:** BMDL10 of developmental parameters after exposure of difenoconazole, dimethomorph and mixture of the two

| Parameters                             | DIF                  |                    | DIM                  |                    | MIX                  |                    |
|----------------------------------------|----------------------|--------------------|----------------------|--------------------|----------------------|--------------------|
|                                        | Best-fitted model    | BMDL <sub>10</sub> | Best-fitted model    | BMDL <sub>10</sub> | Best-fitted model    | BMDL <sub>10</sub> |
| <b>24 hpf autonomous tail swinging</b> | Exponential degree 3 | 1.89               | Exponential degree 3 | 7.90               | Exponential degree 3 | 5.90               |
| <b>48 hpf heart rate</b>               | Hill                 | 0.54               | Exponential degree 3 | 2.31               | Exponential degree 4 | 0.18               |
| <b>48 hpf hatching rate</b>            | Exponential degree 3 | 0.40               | Hill                 | 5.92               | Polynomial degree 5  | 1.37               |
| <b>96 hpf death rate</b>               | Exponential degree 5 | 0.71               | Hill                 | 4.10               | Exponential degree 5 | 1.55               |
| <b>96 hpf deformity rate</b>           | Hill                 | 0.30               | Exponential degree 5 | 1.10               | Hill                 | 2.74               |

**Supplementary Table S3:** Data generated by the zebrafish transcriptome and quality filtering

| Sample Name | Group | Total Bases<br>Count (bp) | Total Bases<br>Count (Gb) | Total Clean<br>Bases (Gb) | Q20 Bases<br>Ratio (%) | Q30 Bases<br>Ratio (%) | Clean Reads<br>Ratio (%) |
|-------------|-------|---------------------------|---------------------------|---------------------------|------------------------|------------------------|--------------------------|
| con-1       | CON   | 45.57                     | 44.41                     | 6.66                      | 97.25                  | 92.68                  | 97.45                    |
| con-2       |       | 45.57                     | 44.32                     | 6.65                      | 97.38                  | 93.03                  | 97.26                    |
| con-3       |       | 45.57                     | 44.09                     | 6.61                      | 97.27                  | 92.76                  | 96.73                    |
| dif-1       | DIF   | 45.57                     | 43.94                     | 6.59                      | 97.35                  | 92.97                  | 96.41                    |
| dif-2       |       | 45.57                     | 44.07                     | 6.61                      | 97.31                  | 92.84                  | 96.69                    |
| dif-3       |       | 45.57                     | 44.25                     | 6.64                      | 97.3                   | 92.83                  | 97.09                    |
| dim-1       | DIM   | 45.57                     | 44.25                     | 6.64                      | 97.22                  | 92.62                  | 97.1                     |
| dim-2       |       | 47.33                     | 44.59                     | 6.69                      | 97.42                  | 93.16                  | 94.22                    |
| dim-3       |       | 47.33                     | 45.5                      | 6.83                      | 97.31                  | 92.92                  | 96.15                    |
| mix-1       | MIX   | 45.57                     | 44.26                     | 6.64                      | 97.32                  | 92.92                  | 97.13                    |
| mix-2       |       | 45.57                     | 43.93                     | 6.59                      | 97.42                  | 93.12                  | 96.4                     |
| mix-3       |       | 45.57                     | 44.16                     | 6.62                      | 97.35                  | 92.94                  | 96.89                    |

**Supplementary Table S4:** Significantly changed KEGG pathways and related genes

| Pathway ID | Pathway                                  | Number of DEGs in the pathway | Rich ratio | Q Value               | Related genes (Gene ID)                                                                                                                                                      |
|------------|------------------------------------------|-------------------------------|------------|-----------------------|------------------------------------------------------------------------------------------------------------------------------------------------------------------------------|
| 3030       | DNA replication                          | 6                             | 0.157895   | $3.36 \times 10^{-8}$ | mcm3 (ENSDARG00000024204)<br>mcm2 (ENSDARG000000102798)<br>mcm5 (ENSDARG00000019507)<br>mcm4 (ENSDARG00000040041)<br>pold1 (ENSDARG00000027689)<br>mcm6 (ENSDARG00000057683) |
| 4110       | Cell cycle                               | 6                             | 0.043165   | $4.53 \times 10^{-5}$ | mcm3 (ENSDARG00000024204)<br>mcm2 (ENSDARG000000102798)<br>mcm5 (ENSDARG00000019507)<br>mcm4 (ENSDARG00000040041)<br>mcm6 (ENSDARG00000057683)<br>ccnb1 (ENSDARG00000051923) |
| 3430       | Mismatch repair                          | 2                             | 0.090909   | 0.025766              | msh6 (ENSDARG000000104541)<br>pold1 (ENSDARG00000027689)                                                                                                                     |
| 860        | Porphyrin and chlorophyll metabolism     | 2                             | 0.066667   | 0.0287                | cpox (ENSDARG00000062025)<br>alas1 (ENSDARG00000021059)                                                                                                                      |
| 4977       | Vitamin digestion and absorption         | 2                             | 0.074074   | 0.0287                | apoa4b.3 (ENSDARG00000094929)<br>cubn (ENSDARG00000087013)                                                                                                                   |
| 440        | Phosphonate and phosphinate metabolism   | 1                             | 0.125      | 0.15703               | pcyt1bb (ENSDARG000000104207)                                                                                                                                                |
| 740        | Riboflavin metabolism                    | 1                             | 0.111111   | 0.15703               | acp5a (ENSDARG00000019763)                                                                                                                                                   |
| 450        | Selenocompound metabolism                | 1                             | 0.0625     | 0.215012              | sephs1 (ENSDARG00000058292)                                                                                                                                                  |
| 5130       | Pathogenic Escherichia coli infection    | 3                             | 0.010909   | 0.215012              | tuba1b (ENSDARG00000045367)<br>myo1d (ENSDARG00000036863)<br>tuba1a (ENSDARG00000001889)                                                                                     |
| 4540       | Gap junction                             | 2                             | 0.015873   | 0.219258              | tuba1b (ENSDARG00000045367)<br>tuba1a (ENSDARG00000001889)                                                                                                                   |
| 62         | Fatty acid elongation                    | 1                             | 0.029412   | 0.255652              | hacd2 (ENSDARG00000014806)                                                                                                                                                   |
| 1040       | Biosynthesis of unsaturated fatty acids  | 1                             | 0.034483   | 0.255652              | hacd2 (ENSDARG00000014806)                                                                                                                                                   |
| 3410       | Base excision repair                     | 1                             | 0.027027   | 0.255652              | pold1 (ENSDARG00000027689)                                                                                                                                                   |
| 4145       | Phagosome                                | 2                             | 0.013699   | 0.255652              | tuba1b (ENSDARG00000045367)<br>tuba1a (ENSDARG00000001889)                                                                                                                   |
| 4210       | Apoptosis                                | 2                             | 0.012048   | 0.255652              | tuba1b (ENSDARG00000045367)<br>tuba1a (ENSDARG00000001889)                                                                                                                   |
| 4218       | Cellular senescence                      | 2                             | 0.010929   | 0.255652              | mybl2b (ENSDARG00000032264)<br>ccnb1 (ENSDARG00000051923)                                                                                                                    |
| 4975       | Fat digestion and absorption             | 1                             | 0.028571   | 0.255652              | apoa4b.3 (ENSDARG00000094929)                                                                                                                                                |
| 260        | Glycine, serine and threonine metabolism | 1                             | 0.022222   | 0.257217              | alas1 (ENSDARG00000021059)                                                                                                                                                   |
| 3420       | Nucleotide excision repair               | 1                             | 0.022727   | 0.257217              | pold1 (ENSDARG00000027689)                                                                                                                                                   |
| 3440       | Homologous recombination                 | 1                             | 0.025      | 0.257217              | pold1 (ENSDARG00000027689)                                                                                                                                                   |

Supplementary Table S5: GO categories of the differentially expressed genes

| Category                  | Term (GO ID)                                        | Number of genes | Rich ratio | Q Value               | Related genes (Gene ID)                                                                                                                                                                                                                                                                                                                                                                                                                                                       |
|---------------------------|-----------------------------------------------------|-----------------|------------|-----------------------|-------------------------------------------------------------------------------------------------------------------------------------------------------------------------------------------------------------------------------------------------------------------------------------------------------------------------------------------------------------------------------------------------------------------------------------------------------------------------------|
| <b>Molecular function</b> |                                                     |                 |            |                       |                                                                                                                                                                                                                                                                                                                                                                                                                                                                               |
|                           | DNA replication origin binding (GO:0003688)         | 5               | 0.263158   | $4.65 \times 10^{-7}$ | mcm3 (ENSDARG00000024204)<br>mcm2 (ENSDARG00000102798)<br>mcm5 (ENSDARG00000019507)<br>mcm4 (ENSDARG00000040041)<br>mcm6 (ENSDARG00000057683)                                                                                                                                                                                                                                                                                                                                 |
|                           | DNA helicase activity (GO:0003678)                  | 5               | 0.119048   | $1.60 \times 10^{-5}$ | mcm3 (ENSDARG00000024204)<br>mcm2 (ENSDARG00000102798)<br>mcm5 (ENSDARG00000019507)<br>mcm4 (ENSDARG00000040041)<br>mcm6 (ENSDARG00000057683)                                                                                                                                                                                                                                                                                                                                 |
|                           | Helicase activity (GO:0004386)                      | 6               | 0.066667   | $2.13 \times 10^{-5}$ | mcm3 (ENSDARG00000024204)<br>mcm2 (ENSDARG00000102798)<br>mcm5 (ENSDARG00000019507)<br>mcm4 (ENSDARG00000040041)<br>hells (ENSDARG00000057738)<br>mcm6 (ENSDARG00000057683)                                                                                                                                                                                                                                                                                                   |
|                           | Single-stranded DNA binding (GO:0003697)            | 5               | 0.081967   | $5.34 \times 10^{-5}$ | mcm3 (ENSDARG00000024204)<br>mcm2 (ENSDARG00000102798)<br>mcm5 (ENSDARG00000019507)<br>mcm4 (ENSDARG00000040041)<br>mcm6 (ENSDARG00000057683)                                                                                                                                                                                                                                                                                                                                 |
|                           | Nucleotide binding (GO:0000166)                     | 15              | 0.009536   | 0.003745              | vars1 (ENSDARG00000044575)<br>mcm3 (ENSDARG00000024204)<br>mcm2 (ENSDARG00000102798)<br>msh6 (ENSDARG00000104541)<br>mcm5 (ENSDARG00000019507)<br>sephs1 (ENSDARG00000058292)<br>mcm4 (ENSDARG00000040041)<br>tuba1b (ENSDARG00000045367)<br>hells (ENSDARG00000057738)<br>pold1 (ENSDARG00000027689)<br>aldh18a1 (ENSDARG00000099579)<br>myo1d (ENSDARG00000036863)<br>mcm6 (ENSDARG00000057683)<br>tuba1a (ENSDARG00000001889)<br>si:ch211-114n24.6<br>(ENSDARG00000036700) |
|                           | Structural constituent of cytoskeleton (GO:0005200) | 3               | 0.085714   | 0.004203              | tuba1b (ENSDARG00000045367)<br>tuba1a (ENSDARG00000001889)<br>si:ch211-114n24.6<br>(ENSDARG00000036700)                                                                                                                                                                                                                                                                                                                                                                       |
|                           | Chromatin binding (GO:0003682)                      | 5               | 0.025381   | 0.008519              | phf13 (ENSDARG00000102023)<br>mcm3 (ENSDARG00000024204)<br>mcm2 (ENSDARG00000102798)<br>dnmt1 (ENSDARG00000030756)<br>mcm4 (ENSDARG00000040041)                                                                                                                                                                                                                                                                                                                               |
| <b>Cellular component</b> |                                                     |                 |            |                       |                                                                                                                                                                                                                                                                                                                                                                                                                                                                               |
|                           | MCM complex (GO:0042555)                            | 5               | 0.384615   | $1.98 \times 10^{-8}$ | mcm3 (ENSDARG00000024204)<br>mcm2 (ENSDARG00000102798)<br>mcm5 (ENSDARG00000019507)<br>mcm4 (ENSDARG00000040041)<br>mcm6 (ENSDARG00000057683)                                                                                                                                                                                                                                                                                                                                 |
|                           | Nucleus (GO:0005634)                                | 23              | 0.00552    | 0.072182              | phf13 (ENSDARG00000102023)                                                                                                                                                                                                                                                                                                                                                                                                                                                    |

|                                                                                                    |   |                 |                       |                                                                                                                                                                                                                                                                                                                                                                                                                                                                                                                                                                                                                                                                                                          |
|----------------------------------------------------------------------------------------------------|---|-----------------|-----------------------|----------------------------------------------------------------------------------------------------------------------------------------------------------------------------------------------------------------------------------------------------------------------------------------------------------------------------------------------------------------------------------------------------------------------------------------------------------------------------------------------------------------------------------------------------------------------------------------------------------------------------------------------------------------------------------------------------------|
|                                                                                                    |   |                 |                       | mcm3 (ENSDARG00000024204)<br>mcm2 (ENSDARG00000102798)<br>mcm5 (ENSDARG00000019507)<br>dnmt1 (ENSDARG00000030756)<br>sephs1 (ENSDARG00000058292)<br>mcm4 (ENSDARG00000040041)<br>zgc:77262 (ENSDARG00000044545)<br>gadd45ga (ENSDARG00000019417)<br>chaf1b (ENSDARG00000056473)<br>nfil3-6 (ENSDARG00000087188)<br>mybl2b (ENSDARG00000032264)<br>cdca7a (ENSDARG00000077620)<br>znf367 (ENSDARG00000021086)<br>hells (ENSDARG00000057738)<br>crema (ENSDARG00000023217)<br>ipo8 (ENSDARG00000058159)<br>pold1 (ENSDARG00000027689)<br>tcf19l (ENSDARG00000040036)<br>ankrd1b (ENSDARG00000076192)<br>si:ch211-89o9.4<br>(ENSDARG00000093237)<br>mcm6 (ENSDARG00000057683)<br>ccnb1 (ENSDARG00000051923) |
| Cyclin B1-CDK1 complex<br>(GO:0097125)                                                             | 1 | 1               | 0.072182              | ccnb1 (ENSDARG00000051923)                                                                                                                                                                                                                                                                                                                                                                                                                                                                                                                                                                                                                                                                               |
| Mutalpha complex (GO:0032301)                                                                      | 1 | 0.5             | 0.082892              | msh6 (ENSDARG00000104541)                                                                                                                                                                                                                                                                                                                                                                                                                                                                                                                                                                                                                                                                                |
| CAF-1 complex (GO:0033186)                                                                         | 1 | 0.333333        | 0.099312              | chaf1b (ENSDARG00000056473)                                                                                                                                                                                                                                                                                                                                                                                                                                                                                                                                                                                                                                                                              |
| Delta DNA polymerase complex<br>(GO:0043625)                                                       | 1 | 0.25            | 0.11017               | pold1 (ENSDARG00000027689)                                                                                                                                                                                                                                                                                                                                                                                                                                                                                                                                                                                                                                                                               |
| Mitochondrial matrix (GO:0005759)                                                                  | 2 | 0.030303        | 0.120492              | ccnb1 (ENSDARG00000051923)<br>alas1 (ENSDARG00000021059)                                                                                                                                                                                                                                                                                                                                                                                                                                                                                                                                                                                                                                                 |
| <b>Biological process</b>                                                                          |   |                 |                       |                                                                                                                                                                                                                                                                                                                                                                                                                                                                                                                                                                                                                                                                                                          |
| Pre-replicative complex assembly<br>involved in nuclear cell cycle DNA<br>replication (GO:0006267) | 5 | 0.55555555<br>6 | $4.38 \times 10^{-9}$ | mcm3 (ENSDARG00000024204)<br>mcm2 (ENSDARG00000102798)<br>mcm5 (ENSDARG00000019507)<br>mcm4 (ENSDARG00000040041)<br>mcm6 (ENSDARG00000057683)                                                                                                                                                                                                                                                                                                                                                                                                                                                                                                                                                            |
| Double-strand break repair via break-<br>induced replication (GO:0000727)                          | 5 | 0.38461538<br>5 | $2.22 \times 10^{-8}$ | mcm3 (ENSDARG00000024204)<br>mcm2 (ENSDARG00000102798)<br>mcm5 (ENSDARG00000019507)<br>mcm4 (ENSDARG00000040041)<br>mcm6 (ENSDARG00000057683)                                                                                                                                                                                                                                                                                                                                                                                                                                                                                                                                                            |
| DNA replication initiation<br>(GO:0006270)                                                         | 5 | 0.23809523<br>8 | $2.29 \times 10^{-7}$ | mcm3 (ENSDARG00000024204)<br>mcm2 (ENSDARG00000102798)<br>mcm5 (ENSDARG00000019507)<br>mcm4 (ENSDARG00000040041)<br>mcm6 (ENSDARG00000057683)                                                                                                                                                                                                                                                                                                                                                                                                                                                                                                                                                            |
| DNA replication (GO:0006260)                                                                       | 6 | 0.06896551<br>7 | $8.38 \times 10^{-6}$ | mcm3 (ENSDARG00000024204)<br>mcm2 (ENSDARG00000102798)<br>mcm5 (ENSDARG00000019507)<br>mcm4 (ENSDARG00000040041)<br>pold1 (ENSDARG00000027689)<br>mcm6 (ENSDARG00000057683)                                                                                                                                                                                                                                                                                                                                                                                                                                                                                                                              |
| Mitotic DNA replication initiation<br>(GO:1902975)                                                 | 3 | 0.6             | $8.38 \times 10^{-6}$ | mcm3 (ENSDARG00000024204)<br>mcm2 (ENSDARG00000102798)<br>mcm4 (ENSDARG00000040041)                                                                                                                                                                                                                                                                                                                                                                                                                                                                                                                                                                                                                      |

|                                                        |   |                 |                       |                                                                                                                                                                                                    |
|--------------------------------------------------------|---|-----------------|-----------------------|----------------------------------------------------------------------------------------------------------------------------------------------------------------------------------------------------|
| Mitotic cell cycle (GO:0000278)                        | 6 | 0.06521739<br>1 | $9.56 \times 10^{-6}$ | mcm5 (ENSDARG00000019507)<br>tuba1b (ENSDARG00000045367)<br>chaf1b (ENSDARG00000056473)<br>mybl2b (ENSDARG00000032264)<br>tuba1a (ENSDARG00000001889)<br>si:ch211-114n24.6<br>(ENSDARG00000036700) |
| DNA unwinding involved in DNA replication (GO:0006268) | 3 | 0.27272727<br>3 | $9.75 \times 10^{-5}$ | mcm2 (ENSDARG00000102798)<br>mcm4 (ENSDARG00000040041)<br>mcm6 (ENSDARG00000057683)                                                                                                                |

## References

1. Cock, P.J.A.; Fields, C.J.; Goto, N.; Heuer, M.L.; Rice, P.M. The Sanger FASTQ file format for sequences with quality scores, and the Solexa/Illumina FASTQ variants. *Nucleic Acids Research* **2010**, *38*, 1767–1771, doi:10.1093/nar/gkp1137.
2. Kim, D.; Landmead, B.; Salzberg, S.L. HISAT: a fast spliced aligner with low memory requirements. *Nature Methods* **2015**, *12*, 357–U121, doi:10.1038/nmeth.3317.
3. Langmead, B.; Salzberg, S.L. Fast gapped-read alignment with Bowtie 2. *Nature Methods* **2012**, *9*, 357–359, doi:10.1038/nmeth.1923.
4. Li, B.; Dewey, C.N. RSEM: accurate transcript quantification from RNA-Seq data with or without a reference genome. *BMC Bioinformatics* **2011**, *12*, 323, doi:10.1186/1471-2105-12-323.
5. Love, M.I.; Huber, W.; Anders, S. Moderated estimation of fold change and dispersion for RNA-seq data with DESeq2. *Genome Biology* **2014**, *15*, 550, doi:10.1186/s13059-014-0550-8.
6. Abdi, H. The Bonferroni and Šidák Corrections for Multiple Comparisons. *Encyclopedia of measurement and statistics* **2007**, *1*, 1–9.
